# Supplementary material for: Psychiatric side effects induced by chloroquine and hydroxychloroquine: a systematic review of case reports and population studies
Source: bioRxiv or medRxiv preprint supplement (doi:10.1101/2020.10.05.20207423), 2020-10-07
Supplement: Supplementary file [file media-1.pdf]

**Title:** Psychiatric side effects induced by chloroquine and hydroxychloroquine: a systematic review of case reports and population studies

**Authors:** Fernanda Talarico<sup>1</sup>, Sucheta Chakravarty<sup>2</sup>, Yang S. Liu<sup>1</sup>, Andrew Greenshaw<sup>1</sup>, Ives Cavalcante Passos<sup>3</sup>, Bo Cao<sup>1</sup>

<sup>1</sup> Department of Psychiatry, University of Alberta. Edmonton, AB, Canada

<sup>2</sup> Department of Psychology, University of Alberta, Edmonton, AB, Canada.

<sup>3</sup> Programa de Pós-Graduação em Psiquiatria e Ciências do Comportamento, Laboratory of Molecular Psychiatry and Bipolar Disorder Program, Hospital de Clínicas de Porto Alegre, Universidade Federal do Rio Grande do Sul, Porto Alegre, RS, Brazil

**Figure S1:** Distribution of drug dosage and the onset of psychiatric side effects with all case-reports. Arrow: highlighting the individual who took high drug dosage (4,700mg). P-value: result of linear regression.

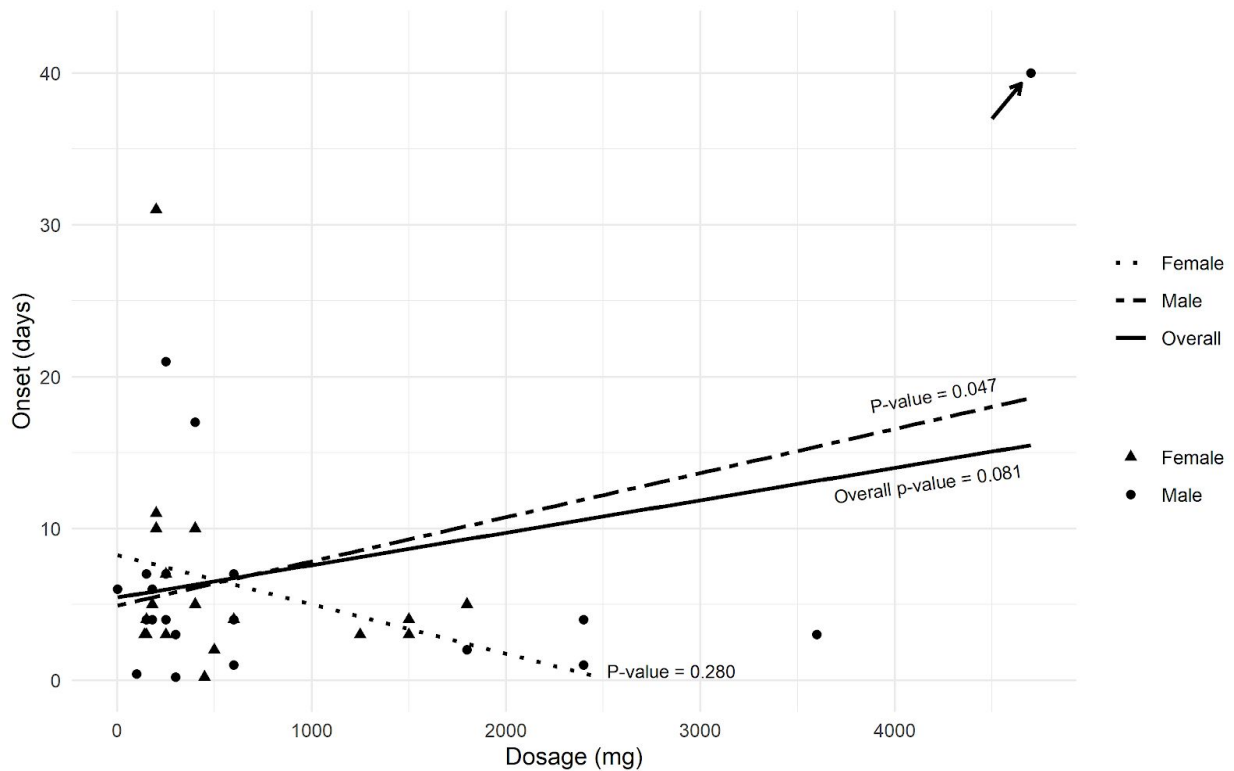

**Table S1:** Psychiatric side effects in case-reports studies.

| <b>Psychiatric side effects</b>     | <b>How many appearances</b> |
|-------------------------------------|-----------------------------|
| excessive talking                   | 23                          |
| increased psychomotor activity      | 22                          |
| auditory hallucination              | 21                          |
| decreased need for sleep / insomnia | 21                          |
| irritable mood                      | 18                          |
| talking irrelevantly                | 16                          |
| delusion of grandiosity             | 15                          |
| paranoia                            | 12                          |
| visual hallucination                | 12                          |
| aggressive/violence                 | 11                          |
| confusion                           | 10                          |
| restless                            | 9                           |
| suicidal ideation                   | 9                           |
| depressive mood                     | 8                           |
| elated affect                       | 8                           |
| persecutory delusion                | 7                           |
| flight of ideas                     | 6                           |
| distractible                        | 5                           |
| generalized anxiety                 | 5                           |
| non-specific psychotic symptoms     | 5                           |
| non-specific delusion               | 4                           |
| catatonic state                     | 3                           |
| derealization/depersonalization     | 3                           |

|                            |   |
|----------------------------|---|
| disturbed appetite         | 3 |
| headaches                  | 3 |
| laughing without reason    | 3 |
| lightheadednes             | 3 |
| tactile hallucination      | 3 |
| tremor                     | 3 |
| worthlessness              | 3 |
| abusive                    | 2 |
| delirium                   | 2 |
| increased energy           | 2 |
| increased self-esteem      | 2 |
| kinaesthetic hallucination | 2 |
| loss of interest           | 2 |
| lost of memory             | 2 |
| weeping spells             | 2 |
| cheerful                   | 1 |
| crying spells              | 1 |
| delusion of erotomania     | 1 |
| delusion of reference      | 1 |
| excitation                 | 1 |
| expansive mood             | 1 |
| feel being lost            | 1 |
| hostility                  | 1 |
| increased libido           | 1 |
| non-specific hallucination | 1 |

|                             |   |
|-----------------------------|---|
| non-specific manic symptoms | 1 |
| over socializing            | 1 |
| partition delusion          | 1 |
| pessimism                   | 1 |
| psychomotor retardation     | 1 |
| psychotic episode           | 1 |
| racing thoughts             | 1 |
| self-harm                   | 1 |
| sweating                    | 1 |
